# Supplementary material for: 13C NMR aided design of molecularly imprinted adsorbents for selectively preparative separation of erythromycin
Source: Royal Society of Chemistry journal article supplement (doi:10.1039/c3tb21636e), 2014-01-01
Supplement: c3tb21636e.pdf [file c3tb21636e.pdf]

## Supporting information

Table S1  $^{13}\text{C}$  resonance assignments of ERY in chloroform and comparison with those observed for ERY mixed with different functional monomers.

| Position | ERY                   |                       |                             | ERY-AA                |                             | ERY-HEMA              |                             | ERY-MAA               |                             | ERY-MMA               |                             |
|----------|-----------------------|-----------------------|-----------------------------|-----------------------|-----------------------------|-----------------------|-----------------------------|-----------------------|-----------------------------|-----------------------|-----------------------------|
|          | $\delta^{13}\text{C}$ | $\delta^{13}\text{C}$ | $\Delta\delta^{13}\text{C}$ |
| 1        | 176.03                | 176.21                | 0.18                        | 176.02                | -0.01                       | 176.24                | 0.21                        | 175.89                | -0.14                       |                       |                             |
| 2        | 45.00                 | 44.93                 | -0.07                       | 44.89                 | -0.11                       | 44.96                 | -0.04                       | 44.92                 | -0.08                       |                       |                             |
| 3        | 80.07                 | 80.02                 | -0.05                       | 80.04                 | -0.03                       | 80.38                 | 0.31                        | 79.98                 | -0.09                       |                       |                             |
| 4        | 39.54                 | 39.38                 | -0.16                       | 39.39                 | -0.15                       | 39.45                 | -0.09                       | 39.45                 | -0.09                       |                       |                             |
| 5        | 83.67                 | 83.65                 | -0.02                       | 83.69                 | 0.02                        | 84.81                 | 1.14                        | 83.57                 | -0.10                       |                       |                             |
| 6        | 74.77                 | 74.76                 | -0.01                       | 74.60                 | -0.17                       | 74.82                 | 0.05                        | 74.69                 | -0.08                       |                       |                             |
| 7        | 38.58                 | 38.58                 | 0                           | 38.45                 | -0.13                       | 38.62                 | 0.04                        | 38.53                 | -0.05                       |                       |                             |
| 8        | 45.23                 | 45.13                 | -0.10                       | 45.00                 | -0.23                       | 45.04                 | -0.19                       | 45.15                 | -0.08                       |                       |                             |
| 9        | 222.09                | 222.07                | -0.02                       | 221.99                | -0.10                       | 222.10                | 0.01                        | 221.90                | -0.19                       |                       |                             |
| 10       | 37.96                 | 37.90                 | -0.06                       | 37.90                 | -0.06                       | 38.07                 | 0.11                        | 37.91                 | -0.05                       |                       |                             |
| 11       | 69.05                 | 68.94                 | -0.11                       | 68.82                 | -0.23                       | 69.01                 | -0.04                       | 68.95                 | -0.10                       |                       |                             |
| 12       | 74.95                 | 74.76                 | -0.19                       | 74.73                 | -0.22                       | 74.95                 | 0                           | 74.88                 | -0.07                       |                       |                             |
| 13       | 77.01                 | 77.04                 | 0.03                        | 76.90                 | -0.11                       | 77.16                 | 0.15                        | 76.91                 | -0.10                       |                       |                             |
| 14       | 21.19                 | 21.08                 | -0.11                       | 21.07                 | -0.12                       | 21.13                 | -0.06                       | 21.13                 | -0.06                       |                       |                             |
| 15       | 10.77                 | 10.70                 | -0.07                       | 10.64                 | -0.13                       | 10.71                 | -0.06                       | 10.68                 | -0.09                       |                       |                             |
| 16       | 16.06                 | 16.03                 | -0.03                       | 15.94                 | -0.12                       | 16.10                 | 0.04                        | 15.98                 | -0.08                       |                       |                             |
| 17       | 9.24                  | 9.20                  | -0.04                       | 9.16                  | -0.08                       | 9.44                  | 0.20                        | 9.16                  | -0.08                       |                       |                             |
| 18       | 26.93                 | 26.68                 | -0.25                       | 26.60                 | -0.33                       | 26.72                 | -0.21                       | 26.85                 | -0.08                       |                       |                             |
| 19       | 18.41                 | 18.39                 | -0.02                       | 18.32                 | -0.09                       | 18.41                 | 0                           | 18.35                 | -0.06                       |                       |                             |
| 20       | 12.16                 | 12.10                 | -0.06                       | 12.05                 | -0.11                       | 12.15                 | -0.01                       | 12.06                 | -0.10                       |                       |                             |
| 21       | 16.29                 | 16.28                 | -0.01                       | 16.17                 | -0.12                       | 16.32                 | 0.03                        | 16.22                 | -0.07                       |                       |                             |
| 1'       | 103.33                | 103.22                | -0.11                       | 103.21                | -0.12                       | 102.81                | -0.52                       | 103.23                | -0.10                       |                       |                             |
| 2'       | 71.03                 | 71.00                 | -0.03                       | 71.02                 | -0.01                       | 70.47                 | -0.56                       | 70.97                 | -0.06                       |                       |                             |
| 3'       | 65.71                 | 65.65                 | -0.06                       | 65.58                 | -0.13                       | 64.70                 | -1.01                       | 65.61                 | -0.10                       |                       |                             |
| 4'       | 28.74                 | 28.63                 | -0.11                       | 28.82                 | 0.08                        | 30.74                 | 2.00                        | 28.66                 | -0.08                       |                       |                             |
| 5'       | 68.96                 | 68.94                 | -0.02                       | 68.86                 | -0.10                       | 67.47                 | -1.49                       | 68.89                 | -0.07                       |                       |                             |
| 6'       | 21.51                 | 21.43                 | -0.08                       | 21.37                 | -0.14                       | 21.18                 | -0.33                       | 21.43                 | -0.08                       |                       |                             |
| 7'       | 40.43                 | 40.34                 | -0.09                       | 40.26                 | -0.17                       | 39.27                 | -1.16                       | 40.28                 | -0.15                       |                       |                             |
| 8'       | 40.38                 | 40.27                 | -0.11                       | 40.26                 | -0.12                       | 39.27                 | -1.11                       | 40.28                 | -0.10                       |                       |                             |
| 1''      | 96.41                 | 96.35                 | -0.06                       | 96.35                 | -0.06                       | 96.55                 | 0.14                        | 96.33                 | -0.08                       |                       |                             |
| 2''      | 35.04                 | 34.98                 | -0.06                       | 34.91                 | -0.13                       | 35.05                 | 0.01                        | 34.99                 | -0.05                       |                       |                             |
| 3''      | 72.71                 | 72.70                 | -0.01                       | 72.60                 | -0.11                       | 72.65                 | -0.06                       | 72.66                 | -0.05                       |                       |                             |
| 4''      | 78.07                 | 78.00                 | -0.07                       | 77.94                 | -0.13                       | 78.05                 | -0.02                       | 78.03                 | -0.04                       |                       |                             |
| 5''      | 65.58                 | 65.42                 | -0.16                       | 65.29                 | -0.29                       | 65.65                 | 0.07                        | 65.51                 | -0.07                       |                       |                             |
| 6''      | 18.70                 | 18.59                 | -0.11                       | 18.49                 | -0.21                       | 18.55                 | -0.15                       | 18.64                 | -0.06                       |                       |                             |
| 7''      | 21.59                 | 21.50                 | -0.09                       | 21.44                 | -0.15                       | 21.39                 | -0.20                       | 21.49                 | -0.10                       |                       |                             |
| 8''      | 49.61                 | 49.52                 | -0.09                       | 49.49                 | -0.12                       | 49.44                 | -0.17                       | 49.52                 | -0.09                       |                       |                             |

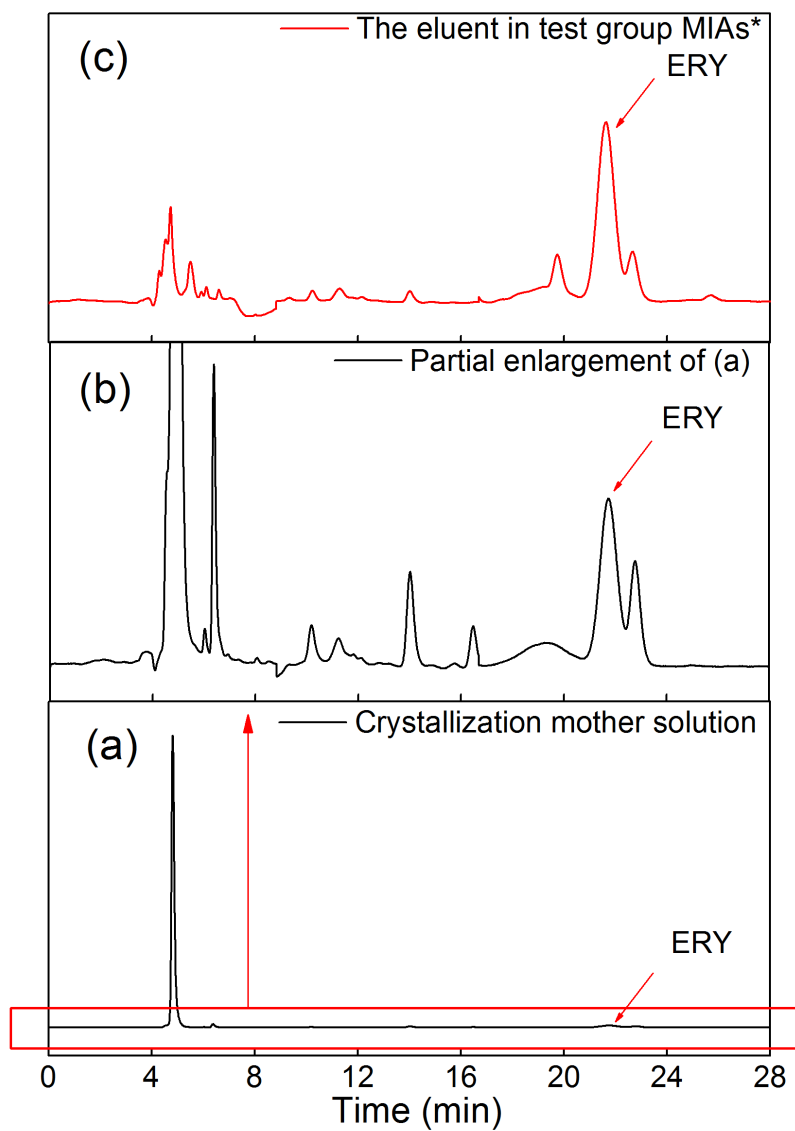

Fig. S1 HPLC chromatograms of different ERY samples.
